# Supplementary material for: Characterization of Dietary Patterns in the Danish National Birth Cohort in Relation to Preterm Birth
Source: PLoS One. 2014 Apr 18;9(4):e93644. doi: 10.1371/journal.pone.0093644 (PMC3991586; doi:10.1371/journal.pone.0093644)
Supplement: File S1 — Tables of food composition of the seven dietary patterns, reflected as average intake in g/day (mean and standard deviation) within pattern score quintiles. (PDF) [file pone.0093644.s004.pdf]

| Vegetables-Prudent | 1. Quintile | 2. Quintile |       | 3. Quintile |       | 4. Quintile |       | 5. Quintile |       |        |       |
|--------------------|-------------|-------------|-------|-------------|-------|-------------|-------|-------------|-------|--------|-------|
|                    | g/day       | Mean        | Std   | Mean        | Std   | Mean        | Std   | Mean        | Std   | Mean   | Std   |
| Cabbage            |             | 5,4         | 4,4   | 9,1         | 6,6   | 12,5        | 8,8   | 16,7        | 11,5  | 27,9   | 24,2  |
| Onion              |             | 7,7         | 4,7   | 11,4        | 6,3   | 14,2        | 7,9   | 17,8        | 10,1  | 28,1   | 20,4  |
| Mushroom           |             | 2,3         | 2,4   | 3,8         | 3,6   | 5,3         | 4,9   | 7,6         | 6,7   | 14,7   | 16,6  |
| Corn               |             | 1,8         | 2,4   | 3,7         | 3,8   | 5,5         | 5,4   | 8,3         | 7,6   | 15,8   | 16,8  |
| Salad              |             | 1,7         | 1,8   | 3,1         | 2,9   | 4,5         | 4,4   | 6,8         | 6,2   | 14,0   | 14,7  |
| Tomato             |             | 10,4        | 7,5   | 15,7        | 10,4  | 20,3        | 13,5  | 26,9        | 18,5  | 49,7   | 51,0  |
| Root               |             | 7,5         | 7,7   | 12,6        | 11,0  | 17,4        | 15,0  | 23,5        | 27,4  | 46,6   | 67,1  |
| Veg_other          |             | 7,2         | 5,6   | 12,7        | 8,5   | 18,7        | 11,5  | 26,8        | 15,6  | 54,2   | 37,2  |
| Asian veg          |             | 0,0         | 0,0   | 0,0         | 0,0   | 0,0         | 0,0   | 0,0         | 0,0   | 0,0    | 0,0   |
| Potatoes           |             | 105,8       | 68,4  | 118,0       | 72,9  | 125,9       | 80,0  | 133,1       | 83,1  | 152,1  | 112,3 |
| French_frites      |             | 9,2         | 9,7   | 8,4         | 8,3   | 7,8         | 8,1   | 7,4         | 8,1   | 7,4    | 10,6  |
| Nuts               |             | 1,3         | 3,2   | 1,5         | 3,5   | 1,8         | 4,3   | 2,1         | 4,9   | 2,8    | 6,9   |
| Soya               |             | 0,6         | 16,4  | 0,5         | 10,9  | 0,8         | 13,1  | 1,7         | 28,4  | 5,8    | 59,1  |
| Legumes            |             | 3,0         | 3,1   | 5,5         | 4,7   | 8,6         | 7,0   | 12,0        | 9,3   | 22,1   | 20,8  |
| Fruit_citrus       |             | 35,5        | 59,7  | 31,3        | 50,6  | 31,3        | 48,8  | 31,4        | 47,7  | 35,2   | 50,0  |
| Berries            |             | 0,5         | 1,0   | 0,6         | 1,2   | 0,7         | 1,4   | 0,8         | 1,6   | 1,0    | 2,4   |
| Fruit_dried        |             | 4,7         | 12,5  | 6,2         | 13,3  | 7,5         | 15,1  | 9,1         | 16,8  | 11,9   | 20,2  |
| Fruit_other        |             | 12,3        | 19,6  | 22,0        | 31,4  | 30,8        | 43,7  | 42,4        | 55,1  | 61,5   | 71,3  |
| Banana             |             | 17,1        | 24,0  | 20,1        | 24,5  | 21,9        | 25,9  | 23,5        | 26,0  | 26,3   | 26,9  |
| Fruit_nordic       |             | 43,0        | 49,0  | 54,2        | 53,7  | 60,7        | 55,3  | 65,2        | 55,4  | 75,2   | 57,5  |
| Poultry            |             | 18,6        | 14,9  | 22,6        | 16,8  | 24,5        | 17,8  | 26,8        | 19,3  | 30,1   | 23,0  |
| Pork               |             | 24,0        | 15,4  | 24,7        | 15,8  | 24,3        | 16,3  | 23,8        | 16,5  | 23,3   | 19,2  |
| Beef_veal          |             | 36,9        | 21,1  | 41,3        | 22,8  | 41,8        | 23,2  | 43,8        | 24,5  | 47,8   | 36,9  |
| Lamb               |             | 1,0         | 3,4   | 1,5         | 3,8   | 1,8         | 4,4   | 2,2         | 4,8   | 3,0    | 6,4   |
| Meat_mixed         |             | 4,9         | 4,4   | 4,8         | 4,4   | 4,5         | 4,2   | 4,2         | 4,4   | 4,2    | 5,7   |
| Meat_cold          |             | 12,7        | 12,2  | 11,7        | 10,9  | 11,3        | 10,5  | 10,9        | 10,5  | 10,2   | 10,9  |
| Offal              |             | 0,3         | 1,6   | 0,3         | 1,4   | 0,3         | 1,5   | 0,3         | 1,3   | 0,4    | 2,3   |
| Dessert_dairy      |             | 4,2         | 5,8   | 4,6         | 6,0   | 4,9         | 6,6   | 5,1         | 6,7   | 5,5    | 7,9   |
| Chocolate          |             | 10,3        | 12,7  | 8,9         | 9,9   | 8,6         | 9,9   | 8,5         | 9,4   | 8,5    | 9,8   |
| Candy              |             | 19,2        | 18,8  | 18,6        | 16,9  | 18,4        | 17,2  | 18,5        | 17,0  | 18,7   | 19,2  |
| Sweet_spread       |             | 6,0         | 8,7   | 6,8         | 9,0   | 7,1         | 9,2   | 7,7         | 9,7   | 8,2    | 10,1  |
| Sugar_cakes        |             | 4,2         | 4,1   | 5,2         | 5,0   | 5,9         | 5,6   | 6,8         | 6,5   | 8,6    | 8,6   |
| Rice               |             | 9,5         | 7,0   | 10,5        | 6,9   | 11,0        | 7,3   | 11,7        | 7,6   | 13,5   | 10,1  |
| Pasta              |             | 12,3        | 8,0   | 13,7        | 8,1   | 14,3        | 8,4   | 15,2        | 8,7   | 16,7   | 10,5  |
| Breakfast_cereal   |             | 26,4        | 27,1  | 27,9        | 26,8  | 28,8        | 26,9  | 30,7        | 28,0  | 32,7   | 30,4  |
| Bread_dark         |             | 136,6       | 80,6  | 141,0       | 78,9  | 148,0       | 80,5  | 152,7       | 83,6  | 159,0  | 85,6  |
| Bread_white        |             | 94,2        | 56,9  | 87,0        | 51,9  | 85,0        | 50,5  | 83,6        | 50,3  | 84,3   | 53,3  |
| Oil                |             | 0,7         | 1,1   | 1,0         | 1,5   | 1,4         | 2,0   | 1,8         | 2,7   | 2,9    | 4,7   |
| Margarine          |             | 23,4        | 21,6  | 21,2        | 19,3  | 20,5        | 18,7  | 20,1        | 18,3  | 19,9   | 18,9  |
| Dressing_sauce     |             | 4,3         | 5,4   | 4,6         | 5,4   | 4,7         | 5,3   | 5,0         | 5,8   | 5,5    | 7,2   |
| Fish_lean          |             | 6,5         | 7,6   | 7,6         | 7,4   | 8,3         | 8,2   | 9,2         | 8,5   | 10,7   | 11,7  |
| Fish_oily          |             | 1,9         | 4,0   | 2,7         | 4,8   | 3,3         | 5,2   | 4,1         | 6,1   | 5,6    | 8,1   |
| Shellfish          |             | 1,3         | 2,7   | 1,4         | 2,3   | 1,5         | 2,4   | 1,7         | 2,6   | 2,1    | 3,3   |
| Fish_cold          |             | 10,1        | 13,4  | 10,6        | 11,6  | 11,2        | 12,2  | 12,0        | 12,2  | 14,1   | 16,9  |
| Fish_smoked        |             | 1,4         | 4,1   | 1,4         | 3,0   | 1,6         | 3,2   | 1,8         | 3,5   | 2,4    | 5,0   |
| Wine               |             | 9,6         | 16,0  | 11,4        | 16,1  | 12,0        | 17,0  | 13,7        | 36,3  | 16,7   | 65,4  |
| Beer               |             | 11,0        | 39,6  | 11,6        | 33,7  | 11,5        | 32,3  | 14,4        | 118,6 | 26,6   | 273,0 |
| Liquor             |             | 0,1         | 0,9   | 0,1         | 0,6   | 0,1         | 1,3   | 0,2         | 4,1   | 0,6    | 10,4  |
| Tea                |             | 140,1       | 213,7 | 144,3       | 202,3 | 148,1       | 203,7 | 154,7       | 204,5 | 166,7  | 214,3 |
| Coffee             |             | 131,0       | 226,3 | 141,1       | 224,7 | 149,4       | 227,2 | 146,4       | 218,8 | 152,5  | 223,5 |
| Softdrink_sugar    |             | 191,8       | 272,0 | 192,0       | 268,1 | 188,3       | 255,0 | 199,7       | 271,3 | 227,8  | 339,8 |
| Softdrink_diet     |             | 55,9        | 149,9 | 58,7        | 149,4 | 52,6        | 138,2 | 51,5        | 137,4 | 55,4   | 157,0 |
| Water              |             | 877,1       | 506,5 | 998,7       | 498,1 | 1067,5      | 496,2 | 1131,9      | 502,8 | 1238,4 | 505,5 |
| Juice              |             | 145,2       | 219,7 | 167,3       | 235,4 | 171,6       | 229,5 | 180,1       | 225,5 | 216,1  | 287,8 |
| Milk_lowfat        |             | 528,1       | 402,2 | 499,2       | 379,1 | 495,7       | 373,5 | 485,6       | 376,2 | 490,6  | 392,9 |
| Milk_chocolate     |             | 53,9        | 119,1 | 42,2        | 91,3  | 39,0        | 87,4  | 36,4        | 80,7  | 39,2   | 98,6  |
| Milk_fermented     |             | 2,9         | 7,1   | 3,4         | 7,2   | 3,8         | 7,6   | 4,3         | 8,4   | 4,7    | 9,0   |
| Milk_fullfat       |             | 44,1        | 135,6 | 44,3        | 128,1 | 45,5        | 130,5 | 47,6        | 135,6 | 51,5   | 142,4 |
| Yoghurt            |             | 40,1        | 51,7  | 45,3        | 51,8  | 48,8        | 52,1  | 52,4        | 55,3  | 59,0   | 61,8  |
| Butter             |             | 6,8         | 8,5   | 7,4         | 9,1   | 7,4         | 9,5   | 7,6         | 9,8   | 7,9    | 11,2  |
| Cheese             |             | 2,0         | 6,6   | 2,3         | 6,2   | 2,6         | 6,1   | 2,9         | 6,6   | 3,4    | 7,6   |
| Fresh cheese       |             | 2,4         | 5,0   | 2,9         | 5,9   | 3,4         | 6,5   | 3,8         | 7,6   | 4,9    | 9,0   |
| Hard cheese        |             | 21,9        | 19,1  | 23,8        | 19,4  | 25,6        | 19,7  | 26,4        | 20,2  | 28,7   | 21,1  |
| Snack              |             | 4,3         | 4,6   | 4,2         | 4,4   | 4,1         | 4,4   | 3,9         | 4,4   | 3,9    | 5,4   |
| Egg                |             | 12,6        | 9,1   | 14,4        | 10,0  | 15,2        | 10,2  | 16,5        | 11,3  | 18,7   | 16,3  |

| Alcohol          | 1. Quintile |        | 2. Quintile |        | 3. Quintile |        | 4. Quintile |        | 5. Quintile |        |       |
|------------------|-------------|--------|-------------|--------|-------------|--------|-------------|--------|-------------|--------|-------|
|                  | g/day       | Mean   | Std         | Mean   | Std         | Mean   | Std         | Mean   | Std         | Mean   | Std   |
| Cabbage          |             | 9,8    | 10,2        | 12,1   | 11,5        | 13,8   | 12,6        | 15,7   | 14,9        | 20,0   | 22,0  |
| Onion            |             | 13,4   | 11,8        | 14,1   | 11,2        | 15,1   | 11,5        | 16,4   | 12,7        | 20,0   | 17,2  |
| Mushroom         |             | 5,4    | 8,2         | 5,7    | 7,7         | 6,4    | 8,3         | 7,0    | 9,3         | 9,0    | 12,9  |
| Corn             |             | 7,0    | 10,8        | 6,4    | 8,4         | 6,7    | 9,6         | 6,9    | 9,0         | 8,2    | 12,1  |
| Salad            |             | 6,3    | 10,0        | 5,4    | 7,7         | 5,6    | 7,8         | 5,8    | 7,8         | 7,0    | 9,9   |
| Tomato           |             | 23,1   | 39,1        | 21,5   | 21,9        | 22,9   | 23,6        | 24,8   | 23,7        | 30,6   | 32,4  |
| Root             |             | 10,4   | 9,0         | 14,2   | 11,2        | 18,0   | 14,4        | 22,9   | 19,1        | 42,2   | 72,0  |
| Veg_other        |             | 21,3   | 24,4        | 20,5   | 21,1        | 22,4   | 22,6        | 24,3   | 24,2        | 31,2   | 31,9  |
| Asian veg        |             | 0,0    | 0,0         | 0,0    | 0,0         | 0,0    | 0,0         | 0,0    | 0,0         | 0,0    | 0,0   |
| Potatoes         |             | 121,6  | 87,0        | 119,9  | 77,7        | 123,8  | 79,3        | 127,8  | 82,6        | 141,7  | 100,5 |
| French_frites    |             | 7,8    | 8,3         | 7,8    | 7,8         | 7,9    | 8,4         | 8,1    | 8,7         | 8,6    | 11,4  |
| Nuts             |             | 1,2    | 2,4         | 1,5    | 2,9         | 1,7    | 3,4         | 2,1    | 4,4         | 2,9    | 8,1   |
| Soya             |             | 0,1    | 0,8         | 0,1    | 1,1         | 0,2    | 1,8         | 0,4    | 2,9         | 8,5    | 69,3  |
| Legumes          |             | 7,5    | 10,3        | 8,6    | 9,6         | 9,7    | 10,9        | 11,2   | 12,2        | 14,3   | 18,2  |
| Fruit_citrus     |             | 21,1   | 40,7        | 28,5   | 47,5        | 33,4   | 51,4        | 38,6   | 54,8        | 43,1   | 58,8  |
| Berries          |             | 0,2    | 0,4         | 0,4    | 0,6         | 0,5    | 0,8         | 0,8    | 1,1         | 1,6    | 3,1   |
| Fruit_dried      |             | 3,6    | 7,8         | 5,4    | 10,5        | 7,4    | 13,1        | 9,7    | 17,5        | 13,3   | 24,0  |
| Fruit_other      |             | 37,3   | 61,0        | 32,1   | 49,4        | 31,5   | 46,0        | 32,4   | 46,6        | 35,7   | 48,8  |
| Banana           |             | 20,0   | 26,2        | 21,1   | 25,4        | 21,7   | 25,3        | 22,6   | 25,1        | 23,5   | 26,1  |
| Fruit_nordic     |             | 49,4   | 51,9        | 56,1   | 53,6        | 60,4   | 54,7        | 63,8   | 55,3        | 68,5   | 58,9  |
| Poultry          |             | 24,2   | 19,7        | 24,0   | 18,4        | 24,3   | 18,2        | 24,7   | 18,0        | 25,4   | 20,3  |
| Pork             |             | 23,3   | 16,4        | 23,6   | 15,9        | 23,8   | 15,8        | 24,1   | 16,1        | 25,3   | 19,1  |
| Beef_veal        |             | 39,6   | 23,8        | 40,8   | 23,6        | 41,6   | 24,2        | 43,0   | 25,3        | 46,6   | 34,0  |
| Lamb             |             | 1,5    | 4,5         | 1,6    | 4,1         | 1,8    | 4,3         | 2,0    | 4,5         | 2,6    | 5,8   |
| Meat_mixed       |             | 4,5    | 4,7         | 4,4    | 4,3         | 4,4    | 4,3         | 4,5    | 4,4         | 4,7    | 5,4   |
| Meat_cold        |             | 12,0   | 11,9        | 11,1   | 10,9        | 10,9   | 10,3        | 11,2   | 10,6        | 11,6   | 11,6  |
| Offal            |             | 0,2    | 1,0         | 0,2    | 1,2         | 0,3    | 1,3         | 0,3    | 1,6         | 0,5    | 2,7   |
| Dessert_dairy    |             | 3,5    | 3,5         | 4,1    | 4,1         | 4,6    | 4,8         | 5,3    | 6,1         | 6,9    | 11,2  |
| Chocolate        |             | 10,1   | 12,9        | 8,4    | 9,7         | 8,5    | 9,4         | 8,6    | 9,2         | 9,2    | 10,5  |
| Candy            |             | 17,7   | 17,8        | 17,9   | 16,7        | 18,4   | 16,7        | 19,2   | 17,7        | 20,3   | 20,2  |
| Sweet_spread     |             | 8,4    | 11,1        | 6,7    | 8,9         | 6,7    | 8,6         | 6,8    | 8,7         | 7,2    | 9,3   |
| Sugar_cakes      |             | 5,1    | 5,5         | 5,4    | 5,5         | 5,9    | 5,9         | 6,5    | 6,3         | 7,8    | 7,8   |
| Rice             |             | 11,2   | 8,5         | 11,0   | 7,6         | 11,1   | 7,5         | 11,2   | 7,6         | 11,6   | 8,5   |
| Pasta            |             | 15,1   | 9,6         | 14,4   | 8,7         | 14,2   | 8,5         | 14,3   | 8,6         | 14,3   | 9,2   |
| Breakfast_cereal |             | 22,6   | 24,4        | 28,1   | 26,6        | 30,1   | 27,3        | 32,2   | 28,5        | 33,5   | 31,2  |
| Bread_dark       |             | 151,7  | 86,2        | 144,7  | 80,2        | 143,3  | 78,8        | 147,5  | 80,9        | 150,2  | 84,7  |
| Bread_white      |             | 100,5  | 60,7        | 85,3   | 50,7        | 81,2   | 48,1        | 82,0   | 48,4        | 84,9   | 52,6  |
| Oil              |             | 1,5    | 3,1         | 1,4    | 2,4         | 1,4    | 2,5         | 1,6    | 2,6         | 2,0    | 3,3   |
| Margarine        |             | 23,8   | 23,2        | 20,0   | 18,1        | 19,8   | 17,8        | 20,0   | 17,7        | 21,5   | 19,6  |
| Dressing_sauce   |             | 5,3    | 6,9         | 4,7    | 5,4         | 4,5    | 5,3         | 4,6    | 5,3         | 4,9    | 6,3   |
| Fish_lean        |             | 6,8    | 7,4         | 7,8    | 7,7         | 8,5    | 8,3         | 9,1    | 8,7         | 10,2   | 11,5  |
| Fish_oily        |             | 2,9    | 5,7         | 3,2    | 5,3         | 3,4    | 5,6         | 3,7    | 5,7         | 4,5    | 7,0   |
| Shellfish        |             | 1,5    | 2,6         | 1,5    | 2,5         | 1,5    | 2,5         | 1,6    | 2,7         | 1,9    | 3,2   |
| Fish_cold        |             | 10,0   | 12,0        | 10,7   | 11,8        | 11,4   | 12,5        | 12,1   | 13,4        | 13,8   | 16,7  |
| Fish_smoked      |             | 1,3    | 3,4         | 1,5    | 3,4         | 1,7    | 3,4         | 1,8    | 3,9         | 2,3    | 5,0   |
| Wine             |             | 3,5    | 5,4         | 6,8    | 7,7         | 10,0   | 9,8         | 14,2   | 13,3        | 28,7   | 75,4  |
| Beer             |             | 2,7    | 8,1         | 5,2    | 12,0        | 8,8    | 16,6        | 13,3   | 22,9        | 45,1   | 300,6 |
| Liquor           |             | 0,0    | 0,1         | 0,0    | 0,2         | 0,1    | 0,3         | 0,1    | 0,5         | 0,9    | 11,2  |
| Tea              |             | 104,8  | 167,2       | 133,1  | 191,4       | 153,1  | 204,2       | 168,0  | 217,2       | 194,8  | 241,1 |
| Coffee           |             | 87,0   | 172,5       | 119,6  | 201,3       | 146,6  | 221,0       | 166,0  | 235,5       | 201,2  | 263,0 |
| Softdrink_sugar  |             | 117,4  | 125,6       | 148,3  | 167,4       | 177,4  | 206,2       | 223,9  | 282,6       | 332,4  | 454,7 |
| Softdrink_diet   |             | 24,2   | 52,9        | 36,3   | 73,0        | 46,4   | 95,5        | 59,1   | 128,9       | 108,1  | 263,3 |
| Water            |             | 1011,3 | 511,9       | 1038,4 | 502,2       | 1060,2 | 502,1       | 1080,8 | 509,2       | 1123,0 | 548,3 |
| Juice            |             | 99,3   | 126,0       | 137,6  | 158,9       | 167,2  | 195,2       | 206,7  | 243,1       | 269,5  | 370,5 |
| Milk_lowfat      |             | 472,5  | 365,2       | 504,2  | 368,9       | 510,6  | 374,6       | 512,0  | 389,1       | 499,9  | 423,9 |
| Milk_chocolate   |             | 19,8   | 34,1        | 28,3   | 45,4        | 35,2   | 61,8        | 46,8   | 87,5        | 80,5   | 172,2 |
| Milk_fermented   |             | 4,1    | 8,7         | 3,6    | 7,4         | 3,6    | 7,4         | 3,7    | 7,5         | 4,1    | 8,4   |
| Milk_fullfat     |             | 21,0   | 45,4        | 27,5   | 68,1        | 38,5   | 101,7       | 55,2   | 144,7       | 90,7   | 222,4 |
| Yoghurt          |             | 43,4   | 52,5        | 46,8   | 52,3        | 48,7   | 53,2        | 50,9   | 54,4        | 55,8   | 61,5  |
| Butter           |             | 7,5    | 10,4        | 6,8    | 8,4         | 7,0    | 8,6         | 7,4    | 9,6         | 8,3    | 10,9  |
| Cheese           |             | 2,0    | 6,1         | 2,2    | 5,9         | 2,5    | 6,3         | 2,9    | 7,3         | 3,4    | 7,5   |
| Fresh cheese     |             | 3,4    | 7,3         | 3,2    | 6,5         | 3,3    | 6,6         | 3,6    | 7,1         | 4,0    | 7,4   |
| Hard cheese      |             | 25,0   | 20,8        | 24,1   | 19,5        | 24,4   | 19,3        | 25,6   | 19,8        | 27,2   | 20,7  |
| Snack            |             | 3,6    | 3,9         | 3,9    | 4,0         | 4,0    | 4,3         | 4,2    | 4,9         | 4,7    | 5,9   |
| Egg              |             | 12,9   | 9,4         | 14,1   | 9,6         | 15,3   | 10,4        | 16,3   | 11,3        | 18,9   | 16,2  |

| Western          | 1. Quintile |        | 2. Quintile |        | 3. Quintile |        | 4. Quintile |        | 5. Quintile |        |       |
|------------------|-------------|--------|-------------|--------|-------------|--------|-------------|--------|-------------|--------|-------|
|                  | g/day       | Mean   | Std         | Mean   | Std         | Mean   | Std         | Mean   | Std         | Mean   | Std   |
| Cabbage          |             | 13,1   | 13,3        | 13,3   | 13,2        | 13,8   | 13,8        | 14,2   | 13,5        | 17,1   | 20,5  |
| Onion            |             | 15,9   | 12,7        | 15,0   | 11,9        | 15,1   | 11,9        | 15,2   | 12,2        | 18,0   | 16,9  |
| Mushroom         |             | 7,6    | 10,3        | 6,6    | 8,8         | 6,3    | 8,3         | 6,1    | 8,7         | 6,9    | 11,3  |
| Corn             |             | 7,8    | 10,4        | 6,9    | 9,3         | 6,7    | 9,4         | 6,6    | 9,5         | 7,2    | 11,6  |
| Salad            |             | 8,9    | 12,3        | 6,2    | 8,5         | 5,3    | 7,2         | 4,9    | 6,8         | 4,8    | 6,8   |
| Tomato           |             | 30,0   | 27,7        | 24,7   | 29,8        | 22,4   | 29,9        | 21,5   | 22,6        | 24,3   | 33,5  |
| Root             |             | 23,3   | 30,1        | 20,0   | 26,8        | 19,7   | 27,6        | 20,4   | 37,8        | 24,3   | 52,4  |
| Veg_other        |             | 34,8   | 32,2        | 24,7   | 23,7        | 21,3   | 22,1        | 19,3   | 21,2        | 19,5   | 22,9  |
| Asian veg        |             | 0,0    | 0,0         | 0,0    | 0,0         | 0,0    | 0,0         | 0,0    | 0,0         | 0,0    | 0,0   |
| Potatoes         |             | 82,8   | 50,2        | 100,2  | 56,2        | 118,3  | 65,1        | 140,7  | 75,6        | 192,7  | 119,3 |
| French_frites    |             | 4,3    | 5,1         | 6,4    | 6,2         | 7,9    | 7,4         | 9,3    | 8,7         | 12,3   | 13,3  |
| Nuts             |             | 2,7    | 8,4         | 1,7    | 3,1         | 1,7    | 3,4         | 1,6    | 2,6         | 1,7    | 3,5   |
| Soya             |             | 2,9    | 32,4        | 1,0    | 14,9        | 1,0    | 20,7        | 1,1    | 25,2        | 3,3    | 50,3  |
| Legumes          |             | 9,5    | 10,7        | 9,5    | 11,0        | 9,8    | 11,4        | 10,3   | 12,5        | 12,1   | 17,1  |
| Fruit_citrus     |             | 40,0   | 57,4        | 33,8   | 51,7        | 32,2   | 51,6        | 29,8   | 48,4        | 28,9   | 47,4  |
| Berries          |             | 0,7    | 1,8         | 0,6    | 1,3         | 0,7    | 1,5         | 0,7    | 1,4         | 0,8    | 1,9   |
| Fruit_dried      |             | 14,4   | 24,0        | 8,3    | 15,6        | 6,5    | 12,6        | 5,5    | 11,4        | 4,9    | 10,8  |
| Fruit_other      |             | 48,9   | 63,7        | 35,1   | 51,0        | 31,1   | 47,0        | 28,0   | 44,4        | 25,9   | 40,9  |
| Banana           |             | 28,8   | 30,3        | 23,3   | 26,4        | 20,3   | 24,1        | 18,6   | 22,5        | 17,9   | 22,7  |
| Fruit_nordic     |             | 76,6   | 61,0        | 62,5   | 55,0        | 56,9   | 53,8        | 52,5   | 51,1        | 49,8   | 51,0  |
| Poultry          |             | 26,7   | 20,8        | 25,2   | 18,8        | 23,9   | 17,5        | 23,2   | 17,3        | 23,6   | 19,9  |
| Pork             |             | 11,4   | 7,9         | 17,6   | 9,4         | 22,6   | 11,1        | 28,3   | 13,6        | 40,2   | 21,4  |
| Beef_veal        |             | 29,5   | 17,9        | 36,6   | 19,1        | 41,3   | 21,4        | 46,3   | 23,3        | 57,8   | 37,4  |
| Lamb             |             | 2,6    | 5,5         | 2,1    | 4,4         | 1,8    | 4,1         | 1,6    | 4,0         | 1,5    | 5,3   |
| Meat_mixed       |             | 1,8    | 2,0         | 3,1    | 2,6         | 4,1    | 3,1         | 5,4    | 3,8         | 8,3    | 6,9   |
| Meat_cold        |             | 5,1    | 5,2         | 8,0    | 6,9         | 10,4   | 8,4         | 13,3   | 10,1        | 19,9   | 15,4  |
| Offal            |             | 0,1    | 0,6         | 0,2    | 0,9         | 0,2    | 1,0         | 0,3    | 1,4         | 0,8    | 3,1   |
| Dessert_dairy    |             | 5,0    | 8,0         | 4,8    | 5,8         | 4,8    | 5,7         | 4,7    | 6,0         | 5,2    | 7,5   |
| Chocolate        |             | 8,8    | 11,2        | 8,7    | 10,0        | 8,8    | 10,3        | 8,9    | 10,0        | 9,5    | 10,7  |
| Candy            |             | 18,1   | 17,6        | 18,0   | 16,9        | 18,2   | 16,8        | 18,7   | 17,2        | 20,4   | 20,6  |
| Sweet_spread     |             | 5,7    | 7,8         | 6,2    | 8,2         | 6,8    | 8,9         | 7,6    | 9,7         | 9,5    | 11,4  |
| Sugar_cakes      |             | 6,3    | 6,6         | 5,8    | 5,9         | 5,8    | 5,8         | 6,1    | 6,1         | 6,7    | 7,1   |
| Rice             |             | 11,6   | 7,9         | 11,1   | 7,4         | 11,0   | 7,4         | 10,9   | 7,4         | 11,6   | 9,4   |
| Pasta            |             | 14,9   | 8,7         | 14,5   | 8,6         | 14,2   | 8,4         | 14,1   | 8,7         | 14,5   | 10,1  |
| Breakfast_cereal |             | 36,4   | 29,7        | 30,7   | 27,7        | 27,6   | 26,4        | 25,9   | 26,1        | 25,9   | 28,3  |
| Bread_dark       |             | 125,9  | 74,6        | 138,2  | 78,1        | 144,9  | 80,4        | 153,9  | 80,8        | 174,3  | 88,7  |
| Bread_white      |             | 58,4   | 35,4        | 71,9   | 39,8        | 83,4   | 44,5        | 97,3   | 50,0        | 123,0  | 64,3  |
| Oil              |             | 2,4    | 3,9         | 1,6    | 2,7         | 1,4    | 2,3         | 1,2    | 2,0         | 1,2    | 2,7   |
| Margarine        |             | 12,1   | 10,1        | 15,8   | 12,9        | 19,2   | 15,2        | 23,8   | 18,4        | 34,3   | 27,6  |
| Dressing_sauce   |             | 2,5    | 2,7         | 3,4    | 3,3         | 4,1    | 3,9         | 5,3    | 4,9         | 8,8    | 9,5   |
| Fish_lean        |             | 7,5    | 7,1         | 7,8    | 7,2         | 8,1    | 7,4         | 8,6    | 7,9         | 10,3   | 13,2  |
| Fish_oily        |             | 5,2    | 6,9         | 3,6    | 5,5         | 3,2    | 5,1         | 2,8    | 4,9         | 2,9    | 6,6   |
| Shellfish        |             | 1,4    | 2,4         | 1,4    | 2,3         | 1,5    | 2,3         | 1,6    | 2,6         | 2,1    | 3,6   |
| Fish_cold        |             | 7,7    | 7,8         | 9,2    | 8,7         | 10,5   | 10,0        | 12,3   | 12,0        | 18,3   | 21,4  |
| Fish_smoked      |             | 1,3    | 2,3         | 1,4    | 2,4         | 1,5    | 2,8         | 1,7    | 3,5         | 2,7    | 6,6   |
| Wine             |             | 12,3   | 18,0        | 11,8   | 16,4        | 11,9   | 27,6        | 12,5   | 36,3        | 14,7   | 61,2  |
| Beer             |             | 8,8    | 31,0        | 9,7    | 24,0        | 12,0   | 71,3        | 15,6   | 134,9       | 28,9   | 259,7 |
| Liquor           |             | 0,1    | 0,4         | 0,1    | 0,5         | 0,1    | 3,0         | 0,2    | 5,0         | 0,6    | 9,6   |
| Tea              |             | 182,5  | 227,6       | 158,0  | 206,7       | 142,4  | 196,2       | 139,9  | 201,9       | 131,1  | 202,0 |
| Coffee           |             | 89,9   | 147,9       | 114,9  | 181,0       | 133,3  | 204,7       | 162,8  | 237,6       | 219,5  | 297,4 |
| Softdrink_sugar  |             | 168,8  | 241,6       | 182,2  | 255,2       | 195,1  | 264,5       | 207,1  | 287,3       | 246,2  | 348,7 |
| Softdrink_diet   |             | 36,4   | 96,9        | 45,9   | 117,6       | 55,3   | 140,8       | 61,1   | 155,8       | 75,5   | 198,0 |
| Water            |             | 1179,2 | 494,2       | 1073,5 | 505,4       | 1033,6 | 504,0       | 1005,1 | 514,7       | 1022,4 | 543,5 |
| Juice            |             | 169,3  | 211,9       | 168,9  | 217,9       | 169,8  | 221,9       | 174,8  | 242,1       | 197,6  | 303,1 |
| Milk_lowfat      |             | 441,3  | 345,7       | 487,7  | 356,1       | 506,8  | 374,6       | 522,7  | 393,0       | 540,7  | 441,5 |
| Milk_chocolate   |             | 30,7   | 71,8        | 35,1   | 78,4        | 39,8   | 85,6        | 46,1   | 98,8        | 59,1   | 133,0 |
| Milk_fermented   |             | 4,6    | 9,6         | 3,8    | 8,1         | 3,5    | 7,1         | 3,5    | 7,1         | 3,7    | 7,5   |
| Milk_fullfat     |             | 19,9   | 55,3        | 26,6   | 75,4        | 37,0   | 104,6       | 49,3   | 129,5       | 100,3  | 223,6 |
| Yoghurt          |             | 56,1   | 58,7        | 49,4   | 52,9        | 46,9   | 52,7        | 45,6   | 52,3        | 47,5   | 57,6  |
| Butter           |             | 4,1    | 5,8         | 5,5    | 7,2         | 6,8    | 8,2         | 8,3    | 9,5         | 12,3   | 13,6  |
| Cheese           |             | 3,2    | 7,8         | 2,7    | 6,7         | 2,4    | 5,6         | 2,4    | 6,2         | 2,4    | 6,9   |
| Fresh cheese     |             | 3,8    | 7,7         | 3,3    | 6,6         | 3,1    | 6,3         | 3,3    | 6,3         | 3,9    | 7,8   |
| Hard cheese      |             | 22,8   | 18,8        | 24,1   | 19,1        | 24,7   | 19,5        | 26,0   | 20,2        | 28,8   | 21,9  |
| Snack            |             | 2,5    | 2,8         | 3,4    | 3,3         | 3,9    | 3,8         | 4,6    | 4,6         | 6,0    | 6,8   |
| Egg              |             | 11,2   | 7,9         | 13,0   | 8,6         | 14,7   | 9,4         | 16,5   | 10,4        | 22,0   | 17,3  |

| Nordic           | 1. Quintile |       | 2. Quintile |       | 3. Quintile |        | 4. Quintile |        | 5. Quintile |        |       |
|------------------|-------------|-------|-------------|-------|-------------|--------|-------------|--------|-------------|--------|-------|
|                  | g/day       | Mean  | Std         | Mean  | Std         | Mean   | Std         | Mean   | Std         | Mean   | Std   |
| Cabbage          |             | 10,5  | 11,6        | 12,3  | 11,9        | 13,9   | 14,2        | 15,9   | 15,5        | 18,9   | 20,0  |
| Onion            |             | 13,3  | 11,6        | 14,3  | 11,6        | 15,4   | 12,1        | 16,9   | 13,9        | 19,2   | 16,0  |
| Mushroom         |             | 6,2   | 10,2        | 6,4   | 8,4         | 6,5    | 8,5         | 7,1    | 9,8         | 7,4    | 10,6  |
| Corn             |             | 6,5   | 10,2        | 6,8   | 9,0         | 7,1    | 9,9         | 7,3    | 10,4        | 7,5    | 10,8  |
| Salad            |             | 5,4   | 7,9         | 5,7   | 8,3         | 5,9    | 8,4         | 6,3    | 8,8         | 6,8    | 10,0  |
| Tomato           |             | 20,9  | 27,0        | 22,4  | 31,2        | 23,7   | 26,8        | 26,3   | 29,3        | 29,6   | 30,1  |
| Root             |             | 14,5  | 29,1        | 17,3  | 26,2        | 20,5   | 33,3        | 24,3   | 38,1        | 30,9   | 48,2  |
| Veg_other        |             | 17,4  | 19,5        | 20,8  | 21,7        | 22,9   | 23,5        | 26,6   | 26,7        | 31,8   | 31,5  |
| Asian veg        |             | 0,0   | 0,0         | 0,0   | 0,0         | 0,0    | 0,0         | 0,0    | 0,0         | 0,0    | 0,0   |
| Potatoes         |             | 115,2 | 80,4        | 118,2 | 78,6        | 123,5  | 78,0        | 130,7  | 85,4        | 147,2  | 102,2 |
| French_frites    |             | 12,1  | 12,6        | 8,6   | 8,2         | 7,5    | 7,6         | 6,5    | 7,3         | 5,5    | 6,7   |
| Nuts             |             | 1,4   | 2,7         | 1,5   | 2,7         | 1,7    | 3,2         | 2,0    | 4,3         | 2,8    | 8,3   |
| Soya             |             | 1,5   | 29,0        | 1,1   | 21,1        | 1,7    | 27,9        | 2,5    | 36,6        | 2,6    | 38,3  |
| Legumes          |             | 8,1   | 11,5        | 9,2   | 10,7        | 10,0   | 12,3        | 11,1   | 12,8        | 13,0   | 15,7  |
| Fruit_citrus     |             | 14,8  | 27,9        | 24,4  | 42,3        | 32,8   | 51,0        | 40,5   | 56,2        | 52,2   | 64,4  |
| Berries          |             | 0,4   | 0,9         | 0,5   | 1,0         | 0,6    | 1,2         | 0,8    | 1,5         | 1,2    | 2,7   |
| Fruit_dried      |             | 2,7   | 6,1         | 4,3   | 8,1         | 6,1    | 10,4        | 8,9    | 14,2        | 17,5   | 27,0  |
| Fruit_other      |             | 26,4  | 47,7        | 31,9  | 50,4        | 35,4   | 52,2        | 37,0   | 51,8        | 38,4   | 50,4  |
| Banana           |             | 9,9   | 12,7        | 15,3  | 17,5        | 20,7   | 22,5        | 26,8   | 27,0        | 36,1   | 34,3  |
| Fruit_nordic     |             | 27,4  | 30,7        | 44,0  | 42,7        | 58,3   | 50,2        | 74,0   | 56,5        | 94,4   | 64,1  |
| Poultry          |             | 23,8  | 19,6        | 24,1  | 18,5        | 24,6   | 18,4        | 25,0   | 19,0        | 25,0   | 19,2  |
| Pork             |             | 22,8  | 15,6        | 23,2  | 15,5        | 23,9   | 16,2        | 24,4   | 17,0        | 25,8   | 18,9  |
| Beef_veal        |             | 43,2  | 26,8        | 41,4  | 24,9        | 41,2   | 24,9        | 42,1   | 26,8        | 43,6   | 29,1  |
| Lamb             |             | 1,5   | 4,5         | 1,7   | 4,5         | 1,8    | 4,6         | 2,1    | 4,6         | 2,4    | 5,3   |
| Meat_mixed       |             | 5,0   | 5,0         | 4,6   | 4,4         | 4,4    | 4,3         | 4,4    | 4,6         | 4,4    | 4,8   |
| Meat_cold        |             | 7,2   | 6,6         | 9,3   | 8,1         | 10,9   | 9,6         | 12,8   | 11,2        | 16,7   | 15,3  |
| Offal            |             | 0,2   | 1,6         | 0,2   | 1,2         | 0,3    | 1,5         | 0,3    | 1,7         | 0,4    | 2,1   |
| Dessert_dairy    |             | 5,2   | 7,4         | 4,8   | 7,1         | 4,7    | 5,7         | 4,8    | 6,5         | 4,9    | 6,5   |
| Chocolate        |             | 8,3   | 9,9         | 8,3   | 9,9         | 8,6    | 9,7         | 9,2    | 10,5        | 10,2   | 11,9  |
| Candy            |             | 21,3  | 21,3        | 19,1  | 17,3        | 18,3   | 16,6        | 17,6   | 16,2        | 17,2   | 17,2  |
| Sweet_spread     |             | 4,0   | 5,1         | 5,2   | 6,6         | 6,5    | 8,1         | 8,1    | 9,7         | 12,0   | 13,1  |
| Sugar_cakes      |             | 4,3   | 3,9         | 5,1   | 4,7         | 5,8    | 5,6         | 6,7    | 6,4         | 8,9    | 8,9   |
| Rice             |             | 10,3  | 7,8         | 10,8  | 7,6         | 11,2   | 7,6         | 11,7   | 8,1         | 12,2   | 8,5   |
| Pasta            |             | 13,8  | 8,8         | 14,2  | 8,7         | 14,4   | 8,6         | 14,8   | 9,0         | 15,0   | 9,3   |
| Breakfast_cereal |             | 21,1  | 22,2        | 26,1  | 25,0        | 29,0   | 26,4        | 32,0   | 28,7        | 38,3   | 33,2  |
| Bread_dark       |             | 76,3  | 51,9        | 118,1 | 57,6        | 144,3  | 62,1        | 174,1  | 67,3        | 224,4  | 82,8  |
| Bread_white      |             | 68,5  | 45,3        | 78,8  | 46,3        | 85,5   | 48,7        | 93,0   | 51,6        | 108,1  | 61,7  |
| Oil              |             | 1,4   | 3,0         | 1,5   | 2,6         | 1,5    | 2,6         | 1,6    | 2,9         | 1,8    | 2,9   |
| Margarine        |             | 15,5  | 12,7        | 18,3  | 15,1        | 20,1   | 16,9        | 22,6   | 19,3        | 28,7   | 27,3  |
| Dressing_sauce   |             | 4,7   | 5,6         | 4,7   | 5,5         | 4,7    | 5,4         | 4,9    | 6,0         | 5,1    | 6,8   |
| Fish_lean        |             | 6,6   | 7,6         | 7,7   | 7,6         | 8,4    | 8,1         | 9,3    | 9,3         | 10,3   | 11,1  |
| Fish_oily        |             | 3,2   | 6,1         | 3,4   | 5,8         | 3,5    | 5,7         | 3,7    | 6,0         | 3,8    | 6,0   |
| Shellfish        |             | 1,8   | 3,3         | 1,6   | 2,5         | 1,5    | 2,4         | 1,6    | 2,5         | 1,6    | 2,7   |
| Fish_cold        |             | 7,9   | 9,2         | 9,6   | 9,8         | 11,0   | 11,0        | 13,0   | 13,2        | 16,5   | 19,7  |
| Fish_smoked      |             | 1,2   | 2,8         | 1,5   | 2,9         | 1,7    | 3,5         | 1,9    | 4,1         | 2,3    | 5,4   |
| Wine             |             | 11,3  | 38,1        | 12,0  | 25,3        | 12,7   | 35,9        | 13,7   | 40,0        | 13,5   | 37,9  |
| Beer             |             | 13,8  | 133,9       | 12,8  | 100,4       | 14,4   | 124,5       | 16,2   | 143,4       | 17,8   | 168,7 |
| Liquor           |             | 0,2   | 4,7         | 0,2   | 3,4         | 0,2    | 4,8         | 0,3    | 5,8         | 0,3    | 6,1   |
| Tea              |             | 89,3  | 151,5       | 120,6 | 174,5       | 147,1  | 195,6       | 174,9  | 221,5       | 222,0  | 255,3 |
| Coffee           |             | 104,0 | 198,2       | 134,0 | 214,3       | 146,3  | 223,6       | 158,9  | 230,9       | 177,2  | 244,7 |
| Softdrink_sugar  |             | 291,1 | 391,8       | 202,3 | 273,2       | 183,2  | 250,9       | 165,9  | 227,4       | 157,1  | 215,8 |
| Softdrink_diet   |             | 80,3  | 207,8       | 58,1  | 145,5       | 52,2   | 129,8       | 45,1   | 118,4       | 38,5   | 105,7 |
| Water            |             | 833,8 | 504,9       | 991,2 | 498,6       | 1078,1 | 494,5       | 1152,6 | 486,1       | 1258,0 | 495,1 |
| Juice            |             | 168,3 | 256,3       | 168,0 | 227,5       | 173,3  | 232,3       | 178,0  | 233,2       | 192,8  | 257,9 |
| Milk_lowfat      |             | 428,3 | 373,7       | 477,7 | 368,4       | 505,2  | 374,8       | 522,9  | 381,5       | 565,3  | 412,4 |
| Milk_chocolate   |             | 64,6  | 137,2       | 43,3  | 95,3        | 36,3   | 79,0        | 34,1   | 76,5        | 32,3   | 76,7  |
| Milk_fermented   |             | 2,9   | 5,8         | 3,2   | 6,6         | 3,6    | 7,3         | 4,3    | 8,8         | 5,1    | 10,2  |
| Milk_fullfat     |             | 47,8  | 138,1       | 42,9  | 126,9       | 42,0   | 120,8       | 46,4   | 133,8       | 53,9   | 150,9 |
| Yoghurt          |             | 38,5  | 46,4        | 44,1  | 50,4        | 47,9   | 51,9        | 53,9   | 57,2        | 61,1   | 64,7  |
| Butter           |             | 7,1   | 8,1         | 6,9   | 8,1         | 7,1    | 9,1         | 7,5    | 10,2        | 8,3    | 12,1  |
| Cheese           |             | 1,1   | 2,9         | 1,7   | 3,9         | 2,2    | 4,8         | 3,0    | 6,3         | 5,0    | 11,2  |
| Fresh cheese     |             | 1,8   | 3,6         | 2,5   | 4,5         | 3,1    | 5,6         | 4,0    | 7,1         | 6,0    | 10,9  |
| Hard cheese      |             | 15,1  | 12,6        | 19,8  | 16,1        | 24,5   | 18,8        | 29,1   | 20,6        | 37,8   | 22,6  |
| Snack            |             | 5,6   | 6,4         | 4,3   | 4,7         | 3,8    | 3,9         | 3,5    | 3,8         | 3,1    | 3,5   |
| Egg              |             | 13,6  | 10,3        | 14,5  | 11,0        | 15,2   | 10,9        | 16,1   | 12,2        | 18,1   | 13,9  |

| Seafood          | 1. Quintile |        | 2. Quintile |        | 3. Quintile |        | 4. Quintile |        | 5. Quintile |        |       |
|------------------|-------------|--------|-------------|--------|-------------|--------|-------------|--------|-------------|--------|-------|
|                  | g/day       | Mean   | Std         | Mean   | Std         | Mean   | Std         | Mean   | Std         | Mean   | Std   |
| Cabbage          |             | 10,5   | 12,6        | 12,1   | 12,0        | 13,7   | 13,3        | 15,5   | 14,2        | 19,7   | 20,7  |
| Onion            |             | 10,6   | 8,9         | 13,0   | 10,6        | 15,1   | 11,1        | 17,5   | 12,7        | 23,0   | 17,9  |
| Mushroom         |             | 3,9    | 6,9         | 5,1    | 7,3         | 6,4    | 8,6         | 7,7    | 9,5         | 10,3   | 12,9  |
| Corn             |             | 5,4    | 10,0        | 6,0    | 8,7         | 6,9    | 9,8         | 7,5    | 9,6         | 9,2    | 11,6  |
| Salad            |             | 3,4    | 5,1         | 4,6    | 6,4         | 5,7    | 7,7         | 6,8    | 9,0         | 9,7    | 12,2  |
| Tomato           |             | 14,2   | 13,3        | 18,6   | 16,6        | 22,5   | 19,7        | 27,7   | 25,2        | 39,9   | 48,5  |
| Root             |             | 16,2   | 26,9        | 17,7   | 24,6        | 19,9   | 30,9        | 23,4   | 41,0        | 30,4   | 49,9  |
| Veg_other        |             | 13,2   | 16,3        | 17,5   | 18,8        | 21,8   | 21,7        | 27,6   | 25,1        | 39,4   | 33,1  |
| Asian veg        |             | 0,0    | 0,0         | 0,0    | 0,0         | 0,0    | 0,0         | 0,0    | 0,0         | 0,0    | 0,0   |
| Potatoes         |             | 116,9  | 78,7        | 120,1  | 79,6        | 124,7  | 80,7        | 128,6  | 82,8        | 144,4  | 103,7 |
| French_frites    |             | 9,2    | 9,1         | 8,6    | 9,1         | 7,9    | 8,2         | 7,4    | 8,1         | 7,1    | 10,2  |
| Nuts             |             | 0,9    | 1,8         | 1,2    | 2,2         | 1,6    | 2,6         | 2,1    | 3,7         | 3,6    | 8,9   |
| Soya             |             | 0,3    | 11,1        | 0,5    | 12,2        | 1,3    | 25,1        | 2,1    | 34,8        | 5,2    | 52,5  |
| Legumes          |             | 9,0    | 14,2        | 8,9    | 11,1        | 9,5    | 11,3        | 10,6   | 11,5        | 13,2   | 15,0  |
| Fruit_citrus     |             | 25,2   | 47,5        | 30,8   | 51,6        | 32,9   | 51,9        | 36,1   | 52,1        | 39,6   | 53,4  |
| Berries          |             | 0,3    | 0,7         | 0,5    | 0,9         | 0,6    | 1,2         | 0,8    | 1,6         | 1,2    | 2,7   |
| Fruit_dried      |             | 3,1    | 8,0         | 4,9    | 10,0        | 7,2    | 14,3        | 10,0   | 17,9        | 14,2   | 22,7  |
| Fruit_other      |             | 20,4   | 37,3        | 27,8   | 46,3        | 33,0   | 49,4        | 38,8   | 53,3        | 49,1   | 59,8  |
| Banana           |             | 19,7   | 27,3        | 20,2   | 24,9        | 21,4   | 24,8        | 22,9   | 25,2        | 24,6   | 25,7  |
| Fruit_nordic     |             | 53,2   | 57,3        | 56,3   | 55,9        | 58,5   | 54,2        | 63,2   | 54,1        | 67,0   | 54,0  |
| Poultry          |             | 17,1   | 14,6        | 21,8   | 16,6        | 25,0   | 18,0        | 27,6   | 19,0        | 31,1   | 22,5  |
| Pork             |             | 26,0   | 16,6        | 24,9   | 15,8        | 24,2   | 15,8        | 22,9   | 15,6        | 22,0   | 19,2  |
| Beef_veal        |             | 35,7   | 20,3        | 39,7   | 21,5        | 42,6   | 23,2        | 43,8   | 24,4        | 49,8   | 37,5  |
| Lamb             |             | 0,2    | 1,0         | 0,6    | 1,8         | 1,2    | 2,7         | 2,2    | 3,8         | 5,4    | 8,2   |
| Meat_mixed       |             | 4,8    | 4,4         | 4,7    | 4,4         | 4,6    | 4,3         | 4,3    | 4,1         | 4,2    | 5,7   |
| Meat_cold        |             | 13,4   | 13,3        | 11,2   | 10,5        | 11,0   | 10,1        | 10,7   | 10,0        | 10,4   | 10,9  |
| Offal            |             | 0,1    | 0,5         | 0,1    | 0,7         | 0,2    | 1,1         | 0,4    | 1,5         | 0,7    | 3,1   |
| Dessert_dairy    |             | 4,2    | 5,5         | 4,5    | 6,6         | 4,8    | 6,9         | 5,1    | 6,5         | 5,8    | 7,6   |
| Chocolate        |             | 8,5    | 10,2        | 8,7    | 10,4        | 8,8    | 10,0        | 9,2    | 10,6        | 9,5    | 10,9  |
| Candy            |             | 18,9   | 19,2        | 18,8   | 17,2        | 18,7   | 17,1        | 18,5   | 17,3        | 18,5   | 18,6  |
| Sweet_spread     |             | 6,7    | 9,8         | 6,6    | 9,0         | 7,0    | 9,1         | 7,4    | 9,3         | 8,0    | 9,6   |
| Sugar_cakes      |             | 4,2    | 4,4         | 5,2    | 5,3         | 6,0    | 6,0         | 6,8    | 6,5         | 8,5    | 8,0   |
| Rice             |             | 9,9    | 7,5         | 10,6   | 7,3         | 11,1   | 7,5         | 11,6   | 7,7         | 13,0   | 9,3   |
| Pasta            |             | 13,2   | 8,8         | 13,9   | 8,6         | 14,4   | 8,6         | 14,9   | 8,6         | 15,8   | 9,7   |
| Breakfast_cereal |             | 19,5   | 22,3        | 26,2   | 25,2        | 29,3   | 27,1        | 32,9   | 28,3        | 38,6   | 32,1  |
| Bread_dark       |             | 138,0  | 84,6        | 138,5  | 79,9        | 145,8  | 79,5        | 153,0  | 80,5        | 162,0  | 84,0  |
| Bread_white      |             | 96,1   | 59,3        | 86,2   | 52,6        | 83,9   | 49,1        | 82,6   | 48,9        | 85,2   | 52,1  |
| Oil              |             | 0,5    | 0,7         | 0,8    | 1,1         | 1,1    | 1,5         | 1,7    | 2,2         | 3,7    | 5,0   |
| Margarine        |             | 22,7   | 22,0        | 20,6   | 18,9        | 20,5   | 18,2        | 20,4   | 18,3        | 21,0   | 19,4  |
| Dressing_sauce   |             | 3,4    | 4,0         | 4,3    | 4,7         | 4,9    | 5,3         | 5,1    | 5,7         | 6,3    | 8,3   |
| Fish_lean        |             | 3,5    | 4,2         | 6,1    | 5,5         | 8,1    | 6,5         | 10,3   | 7,6         | 14,3   | 13,5  |
| Fish_oily        |             | 0,6    | 1,7         | 1,5    | 2,8         | 2,7    | 3,8         | 4,5    | 5,2         | 8,4    | 9,3   |
| Shellfish        |             | 0,6    | 0,9         | 1,0    | 1,2         | 1,4    | 1,7         | 1,9    | 2,3         | 3,3    | 4,7   |
| Fish_cold        |             | 5,9    | 6,6         | 8,8    | 8,3         | 11,1   | 10,3        | 13,3   | 12,3        | 18,9   | 21,0  |
| Fish_smoked      |             | 0,4    | 1,0         | 0,9    | 1,6         | 1,3    | 2,1         | 2,0    | 3,0         | 4,0    | 7,0   |
| Wine             |             | 7,5    | 14,3        | 9,9    | 21,3        | 12,5   | 33,4        | 14,6   | 40,9        | 18,7   | 53,9  |
| Beer             |             | 9,1    | 63,1        | 10,8   | 54,9        | 13,6   | 122,8       | 16,8   | 158,0       | 24,7   | 213,0 |
| Liquor           |             | 0,1    | 1,8         | 0,1    | 2,2         | 0,2    | 4,4         | 0,3    | 6,0         | 0,4    | 8,0   |
| Tea              |             | 92,9   | 160,5       | 130,9  | 196,4       | 151,2  | 204,2       | 174,8  | 219,6       | 203,9  | 234,3 |
| Coffee           |             | 167,2  | 267,5       | 140,4  | 224,7       | 139,7  | 216,7       | 137,4  | 207,6       | 135,7  | 196,5 |
| Softdrink_sugar  |             | 190,1  | 282,9       | 189,9  | 267,1       | 196,7  | 275,0       | 198,9  | 270,6       | 223,9  | 316,3 |
| Softdrink_diet   |             | 96,9   | 228,6       | 55,3   | 129,8       | 46,7   | 114,8       | 40,4   | 110,2       | 34,9   | 102,7 |
| Water            |             | 1006,6 | 543,3       | 1024,2 | 516,5       | 1049,9 | 505,5       | 1082,6 | 500,1       | 1150,3 | 502,9 |
| Juice            |             | 144,9  | 234,4       | 162,6  | 230,5       | 172,9  | 235,0       | 187,5  | 233,9       | 212,5  | 268,4 |
| Milk_lowfat      |             | 549,3  | 419,5       | 515,7  | 388,2       | 498,7  | 372,2       | 483,0  | 368,0       | 452,6  | 368,9 |
| Milk_chocolate   |             | 53,8   | 122,3       | 42,9   | 95,3        | 39,7   | 85,0        | 37,2   | 82,9        | 36,9   | 90,9  |
| Milk_fermented   |             | 1,4    | 2,4         | 2,1    | 3,7         | 3,2    | 5,9         | 4,6    | 8,4         | 7,8    | 12,8  |
| Milk_fullfat     |             | 29,2   | 94,2        | 39,4   | 119,7       | 47,0   | 135,7       | 51,1   | 143,3       | 66,3   | 166,2 |
| Yoghurt          |             | 23,8   | 32,2        | 37,8   | 43,6        | 48,3   | 50,4        | 59,3   | 56,5        | 76,4   | 69,7  |
| Butter           |             | 5,6    | 6,0         | 6,6    | 7,3         | 7,0    | 8,1         | 7,9    | 10,2        | 9,9    | 14,1  |
| Cheese           |             | 0,7    | 2,1         | 1,3    | 3,2         | 2,1    | 4,5         | 3,1    | 6,5         | 5,8    | 11,4  |
| Fresh cheese     |             | 1,7    | 3,9         | 2,5    | 4,7         | 3,2    | 5,7         | 4,1    | 7,2         | 6,0    | 10,6  |
| Hard cheese      |             | 22,0   | 20,0        | 23,7   | 19,6        | 24,9   | 19,5        | 26,7   | 19,8        | 29,0   | 20,7  |
| Snack            |             | 4,9    | 5,5         | 4,2    | 4,4         | 4,0    | 4,5         | 3,7    | 4,0         | 3,6    | 4,8   |
| Egg              |             | 10,1   | 6,5         | 13,1   | 7,9         | 15,1   | 9,4         | 17,3   | 11,1        | 21,9   | 17,4  |

| Sweets           | 1. Quintile |        | 2. Quintile |        | 3. Quintile |        | 4. Quintile |        | 5. Quintile |        |       |
|------------------|-------------|--------|-------------|--------|-------------|--------|-------------|--------|-------------|--------|-------|
|                  | g/day       | Mean   | Std         | Mean   | Std         | Mean   | Std         | Mean   | Std         | Mean   | Std   |
| Cabbage          |             | 19,0   | 20,8        | 14,3   | 13,8        | 13,3   | 12,9        | 12,4   | 12,1        | 12,5   | 13,7  |
| Onion            |             | 16,5   | 14,9        | 15,1   | 12,1        | 15,2   | 12,3        | 15,4   | 12,0        | 16,9   | 14,8  |
| Mushroom         |             | 6,8    | 9,8         | 6,4    | 8,8         | 6,4    | 8,7         | 6,6    | 9,2         | 7,4    | 11,0  |
| Corn             |             | 5,5    | 8,4         | 5,9    | 7,8         | 6,5    | 9,1         | 7,4    | 9,6         | 9,8    | 13,8  |
| Salad            |             | 4,5    | 6,6         | 5,2    | 7,2         | 5,9    | 8,2         | 6,5    | 9,1         | 7,9    | 11,3  |
| Tomato           |             | 23,0   | 26,8        | 23,0   | 24,0        | 23,9   | 25,2        | 24,5   | 23,7        | 28,6   | 41,3  |
| Root             |             | 25,9   | 37,9        | 20,6   | 25,4        | 19,7   | 23,2        | 18,9   | 23,1        | 22,6   | 58,3  |
| Veg_other        |             | 22,4   | 24,1        | 22,3   | 23,4        | 23,2   | 24,1        | 24,3   | 25,2        | 27,3   | 29,4  |
| Asian veg        |             | 0,0    | 0,0         | 0,0    | 0,0         | 0,0    | 0,0         | 0,0    | 0,0         | 0,0    | 0,0   |
| Potatoes         |             | 126,8  | 86,3        | 120,8  | 77,9        | 122,4  | 77,8        | 126,2  | 83,7        | 138,6  | 101,8 |
| French_frites    |             | 4,6    | 5,1         | 6,4    | 6,2         | 7,7    | 7,1         | 9,1    | 8,6         | 12,4   | 13,5  |
| Nuts             |             | 1,4    | 2,7         | 1,5    | 2,9         | 1,8    | 3,8         | 1,9    | 3,9         | 2,8    | 8,1   |
| Soya             |             | 1,8    | 28,1        | 1,1    | 15,1        | 1,1    | 17,6        | 0,8    | 11,6        | 4,6    | 58,3  |
| Legumes          |             | 12,6   | 16,4        | 10,0   | 11,5        | 9,7    | 11,9        | 9,2    | 10,9        | 9,8    | 12,3  |
| Fruit_citrus     |             | 46,0   | 64,0        | 34,6   | 52,5        | 30,7   | 48,2        | 27,5   | 44,2        | 25,9   | 43,9  |
| Berries          |             | 0,5    | 1,0         | 0,6    | 1,2         | 0,6    | 1,2         | 0,7    | 1,4         | 1,0    | 2,7   |
| Fruit_dried      |             | 9,4    | 18,5        | 7,9    | 15,6        | 7,6    | 15,3        | 7,3    | 14,6        | 7,3    | 15,5  |
| Fruit_other      |             | 21,9   | 31,7        | 27,3   | 39,1        | 31,8   | 46,2        | 38,4   | 54,8        | 49,7   | 68,7  |
| Banana           |             | 20,9   | 25,0        | 21,1   | 24,8        | 21,7   | 25,7        | 22,2   | 25,9        | 23,0   | 26,7  |
| Fruit_nordic     |             | 63,5   | 59,3        | 60,3   | 56,1        | 59,4   | 55,2        | 57,9   | 52,6        | 57,1   | 52,9  |
| Poultry          |             | 22,6   | 17,5        | 23,8   | 17,9        | 24,4   | 18,4        | 25,1   | 19,1        | 26,6   | 21,4  |
| Pork             |             | 22,4   | 15,9        | 23,0   | 15,4        | 23,6   | 15,6        | 24,4   | 16,4        | 26,7   | 19,6  |
| Beef_veal        |             | 37,6   | 24,2        | 39,7   | 22,8        | 41,8   | 23,5        | 44,1   | 25,8        | 48,5   | 33,7  |
| Lamb             |             | 1,8    | 4,5         | 1,8    | 4,1         | 1,9    | 4,3         | 2,0    | 4,7         | 2,2    | 5,8   |
| Meat_mixed       |             | 3,7    | 3,9         | 4,1    | 3,9         | 4,4    | 4,2         | 4,8    | 4,5         | 5,6    | 6,0   |
| Meat_cold        |             | 9,9    | 10,2        | 10,4   | 10,1        | 11,0   | 10,5        | 11,9   | 11,1        | 13,5   | 12,9  |
| Offal            |             | 0,5    | 2,6         | 0,3    | 1,3         | 0,2    | 1,2         | 0,2    | 1,3         | 0,2    | 1,6   |
| Dessert_dairy    |             | 2,7    | 2,7         | 3,6    | 3,2         | 4,4    | 4,0         | 5,3    | 5,1         | 8,4    | 11,9  |
| Chocolate        |             | 3,8    | 3,8         | 5,8    | 5,2         | 7,7    | 6,9         | 10,5   | 8,9         | 16,9   | 16,6  |
| Candy            |             | 9,3    | 7,8         | 13,5   | 10,1        | 17,4   | 12,6        | 21,6   | 15,0        | 31,7   | 27,5  |
| Sweet_spread     |             | 3,5    | 4,6         | 5,0    | 6,0         | 6,3    | 7,5         | 8,3    | 9,6         | 12,6   | 13,6  |
| Sugar_cakes      |             | 3,3    | 2,8         | 4,4    | 3,5         | 5,5    | 4,3         | 6,9    | 5,6         | 10,7   | 9,9   |
| Rice             |             | 11,2   | 8,2         | 11,2   | 7,6         | 11,1   | 7,4         | 11,2   | 7,7         | 11,4   | 8,8   |
| Pasta            |             | 13,6   | 8,6         | 14,1   | 8,6         | 14,4   | 8,4         | 14,8   | 8,9         | 15,3   | 10,0  |
| Breakfast_cereal |             | 39,1   | 31,0        | 31,2   | 27,4        | 28,1   | 26,4        | 25,5   | 25,6        | 22,6   | 26,1  |
| Bread_dark       |             | 137,3  | 77,3        | 141,7  | 77,7        | 147,4  | 80,7        | 152,0  | 82,3        | 158,8  | 90,8  |
| Bread_white      |             | 57,4   | 29,7        | 70,4   | 36,6        | 82,4   | 42,8        | 97,2   | 50,2        | 126,6  | 67,1  |
| Oil              |             | 1,1    | 1,9         | 1,3    | 2,1         | 1,5    | 2,4         | 1,7    | 2,9         | 2,2    | 4,1   |
| Margarine        |             | 11,9   | 9,3         | 15,3   | 11,8        | 19,3   | 15,0        | 23,8   | 18,4        | 34,8   | 28,1  |
| Dressing_sauce   |             | 3,2    | 4,1         | 4,0    | 4,5         | 4,6    | 5,2         | 5,4    | 5,9         | 6,9    | 8,2   |
| Fish_lean        |             | 9,4    | 10,2        | 8,2    | 7,7         | 8,2    | 8,1         | 8,1    | 8,2         | 8,3    | 10,1  |
| Fish_oily        |             | 3,9    | 6,4         | 3,5    | 5,6         | 3,4    | 5,6         | 3,4    | 5,5         | 3,5    | 6,5   |
| Shellfish        |             | 1,5    | 2,8         | 1,5    | 2,4         | 1,6    | 2,7         | 1,7    | 2,6         | 1,8    | 3,0   |
| Fish_cold        |             | 14,0   | 16,6        | 11,2   | 11,8        | 10,9   | 11,9        | 10,8   | 12,1        | 11,1   | 14,0  |
| Fish_smoked      |             | 2,3    | 5,7         | 1,6    | 3,1         | 1,6    | 3,1         | 1,5    | 3,0         | 1,6    | 3,8   |
| Wine             |             | 9,5    | 14,8        | 11,4   | 18,2        | 12,0   | 16,3        | 12,8   | 18,7        | 17,5   | 72,3  |
| Beer             |             | 9,5    | 36,6        | 10,6   | 28,0        | 11,7   | 32,5        | 12,4   | 34,5        | 30,7   | 296,4 |
| Liquor           |             | 0,1    | 0,5         | 0,1    | 0,8         | 0,1    | 0,6         | 0,1    | 0,9         | 0,8    | 11,2  |
| Tea              |             | 141,2  | 195,5       | 147,7  | 201,8       | 148,9  | 203,6       | 155,2  | 212,0       | 160,9  | 225,1 |
| Coffee           |             | 143,5  | 224,1       | 141,5  | 217,8       | 142,1  | 219,4       | 141,0  | 220,9       | 152,3  | 238,2 |
| Softdrink_sugar  |             | 114,6  | 153,8       | 152,7  | 202,7       | 185,8  | 241,0       | 226,0  | 289,6       | 320,4  | 411,6 |
| Softdrink_diet   |             | 39,0   | 95,6        | 46,7   | 117,3       | 54,1   | 143,3       | 57,7   | 148,2       | 76,6   | 203,1 |
| Water            |             | 1064,0 | 511,4       | 1055,1 | 505,4       | 1058,0 | 507,7       | 1062,3 | 518,3       | 1074,3 | 538,4 |
| Juice            |             | 151,8  | 220,8       | 160,5  | 215,7       | 171,5  | 228,2       | 182,0  | 238,3       | 214,5  | 293,6 |
| Milk_lowfat      |             | 605,1  | 416,3       | 511,4  | 371,1       | 481,8  | 361,2       | 462,3  | 367,1       | 438,7  | 386,0 |
| Milk_chocolate   |             | 22,9   | 48,2        | 30,5   | 60,3        | 38,7   | 82,2        | 48,0   | 100,9       | 70,5   | 149,4 |
| Milk_fermented   |             | 2,8    | 6,9         | 3,5    | 7,5         | 3,9    | 7,8         | 4,2    | 8,3         | 4,7    | 8,8   |
| Milk_fullfat     |             | 31,0   | 102,0       | 38,0   | 115,7       | 43,4   | 127,9       | 49,4   | 136,7       | 71,2   | 175,4 |
| Yoghurt          |             | 50,0   | 59,0        | 48,0   | 52,5        | 48,7   | 52,7        | 49,0   | 54,1        | 49,8   | 56,6  |
| Butter           |             | 5,0    | 6,2         | 6,3    | 7,6         | 7,2    | 8,9         | 8,2    | 10,1        | 10,3   | 13,1  |
| Cheese           |             | 2,2    | 5,4         | 2,4    | 6,0         | 2,6    | 6,4         | 2,8    | 7,1         | 3,0    | 8,1   |
| Fresh cheese     |             | 3,2    | 6,7         | 3,3    | 6,6         | 3,3    | 6,5         | 3,6    | 6,9         | 4,0    | 8,1   |
| Hard cheese      |             | 20,7   | 17,7        | 23,0   | 18,5        | 25,1   | 19,4        | 27,1   | 20,5        | 30,5   | 22,4  |
| Snack            |             | 2,2    | 2,3         | 3,1    | 2,8         | 3,8    | 3,2         | 4,5    | 4,0         | 6,8    | 7,6   |
| Egg              |             | 13,1   | 9,9         | 14,0   | 9,9         | 15,1   | 10,4        | 16,1   | 11,2        | 19,1   | 15,7  |

| Rice-Pasta-Poultry<br>g/day | 1. Quintile |       | 2. Quintile |       | 3. Quintile |       | 4. Quintile |       | 5. Quintile |       |
|-----------------------------|-------------|-------|-------------|-------|-------------|-------|-------------|-------|-------------|-------|
|                             | Mean        | Std   |
| Cabbage                     | 12,5        | 13,1  | 13,0        | 13,4  | 13,6        | 12,9  | 14,8        | 14,7  | 17,6        | 20,1  |
| Onion                       | 13,7        | 11,8  | 14,3        | 11,4  | 14,9        | 11,3  | 16,5        | 13,2  | 19,7        | 17,0  |
| Mushroom                    | 4,7         | 6,3   | 5,5         | 7,0   | 6,2         | 7,4   | 7,3         | 9,3   | 9,9         | 14,5  |
| Corn                        | 6,3         | 9,9   | 6,5         | 9,5   | 6,7         | 9,0   | 7,2         | 9,4   | 8,5         | 12,1  |
| Salad                       | 4,8         | 8,0   | 5,5         | 8,3   | 5,9         | 8,2   | 6,5         | 8,8   | 7,4         | 9,9   |
| Tomato                      | 18,3        | 19,9  | 20,8        | 20,0  | 23,6        | 26,3  | 26,4        | 25,2  | 33,8        | 44,3  |
| Root                        | 20,3        | 51,4  | 19,0        | 30,8  | 19,9        | 26,7  | 22,2        | 29,7  | 26,2        | 36,9  |
| Veg_other                   | 18,5        | 22,2  | 21,1        | 22,6  | 23,1        | 22,6  | 26,0        | 25,5  | 30,9        | 31,2  |
| Asian veg                   | 0,0         | 0,0   | 0,0         | 0,0   | 0,0         | 0,0   | 0,0         | 0,0   | 0,0         | 0,0   |
| Potatoes                    | 163,1       | 101,9 | 131,4       | 79,8  | 118,7       | 71,4  | 111,7       | 70,8  | 109,9       | 91,3  |
| French_frites               | 6,4         | 6,8   | 7,1         | 7,1   | 7,8         | 7,7   | 8,7         | 8,7   | 10,3        | 12,9  |
| Nuts                        | 1,8         | 5,8   | 1,7         | 3,8   | 1,8         | 4,6   | 2,0         | 4,4   | 2,1         | 4,8   |
| Soya                        | 3,2         | 48,5  | 1,4         | 24,6  | 1,4         | 22,1  | 1,4         | 23,8  | 2,0         | 29,4  |
| Legumes                     | 8,8         | 10,5  | 9,2         | 11,8  | 9,5         | 10,6  | 10,8        | 12,7  | 13,0        | 17,0  |
| Fruit_citrus                | 22,2        | 39,2  | 27,9        | 46,4  | 33,0        | 50,6  | 38,1        | 55,6  | 43,4        | 60,7  |
| Berries                     | 1,0         | 2,6   | 0,7         | 1,3   | 0,6         | 1,2   | 0,6         | 1,2   | 0,6         | 1,2   |
| Fruit_dried                 | 5,5         | 12,4  | 6,6         | 13,4  | 7,8         | 15,1  | 9,2         | 17,6  | 10,5        | 19,8  |
| Fruit_other                 | 27,0        | 47,6  | 31,1        | 48,8  | 34,6        | 51,1  | 36,3        | 50,6  | 40,0        | 54,3  |
| Banana                      | 14,5        | 18,8  | 18,0        | 21,3  | 21,5        | 24,1  | 25,4        | 27,4  | 29,5        | 31,8  |
| Fruit_nordic                | 44,7        | 47,7  | 53,0        | 51,4  | 60,2        | 54,1  | 67,6        | 57,7  | 72,7        | 60,2  |
| Poultry                     | 14,3        | 10,6  | 18,6        | 12,1  | 22,8        | 13,9  | 27,8        | 17,3  | 39,1        | 26,0  |
| Pork                        | 25,9        | 17,2  | 24,1        | 15,7  | 23,5        | 15,2  | 22,8        | 15,3  | 23,9        | 19,6  |
| Beef_veal                   | 35,4        | 21,3  | 38,3        | 21,5  | 41,2        | 22,0  | 44,8        | 24,5  | 51,9        | 37,0  |
| Lamb                        | 1,9         | 4,9   | 2,0         | 4,5   | 1,9         | 4,2   | 1,9         | 4,3   | 1,9         | 5,5   |
| Meat_mixed                  | 4,8         | 4,3   | 4,5         | 4,1   | 4,4         | 4,1   | 4,3         | 4,4   | 4,7         | 5,9   |
| Meat_cold                   | 11,6        | 11,1  | 11,0        | 10,5  | 11,1        | 10,5  | 11,0        | 10,7  | 12,1        | 12,4  |
| Offal                       | 0,5         | 2,2   | 0,3         | 1,5   | 0,3         | 1,6   | 0,2         | 1,2   | 0,3         | 1,8   |
| Dessert_dairy               | 4,8         | 7,3   | 4,8         | 6,3   | 4,8         | 6,0   | 4,9         | 5,7   | 5,1         | 7,8   |
| Chocolate                   | 8,4         | 10,1  | 8,7         | 9,6   | 8,9         | 10,1  | 9,2         | 10,6  | 9,5         | 11,7  |
| Candy                       | 14,7        | 14,3  | 16,9        | 14,9  | 18,1        | 15,4  | 20,2        | 18,4  | 23,5        | 23,5  |
| Sweet_spread                | 8,0         | 10,8  | 7,2         | 9,4   | 6,8         | 8,8   | 6,9         | 8,9   | 6,8         | 8,8   |
| Sugar_cakes                 | 7,3         | 8,2   | 6,2         | 6,3   | 5,9         | 5,7   | 5,7         | 5,4   | 5,6         | 5,6   |
| Rice                        | 6,5         | 4,6   | 8,7         | 4,6   | 10,2        | 5,0   | 12,1        | 6,5   | 18,7        | 11,0  |
| Pasta                       | 8,4         | 5,1   | 11,0        | 5,2   | 13,1        | 6,0   | 16,3        | 7,7   | 23,5        | 10,7  |
| Breakfast_cereal            | 23,2        | 25,6  | 26,5        | 25,7  | 29,2        | 26,8  | 32,0        | 28,2  | 35,6        | 31,4  |
| Bread_dark                  | 151,0       | 87,5  | 146,7       | 81,1  | 145,4       | 80,0  | 146,0       | 80,7  | 148,2       | 81,6  |
| Bread_white                 | 99,3        | 60,3  | 87,0        | 51,3  | 83,2        | 49,0  | 81,4        | 48,6  | 83,0        | 51,7  |
| Oil                         | 1,6         | 3,4   | 1,5         | 2,6   | 1,5         | 2,5   | 1,5         | 2,4   | 1,6         | 3,1   |
| Margarine                   | 29,1        | 25,7  | 22,3        | 19,4  | 19,3        | 16,7  | 17,7        | 15,6  | 16,8        | 15,2  |
| Dressing_sauce              | 4,6         | 5,4   | 4,5         | 5,0   | 4,5         | 5,1   | 4,7         | 5,5   | 5,6         | 7,8   |
| Fish_lean                   | 7,2         | 7,3   | 7,9         | 7,5   | 8,4         | 7,6   | 8,9         | 8,3   | 9,9         | 12,6  |
| Fish_oily                   | 2,3         | 4,2   | 2,9         | 4,7   | 3,5         | 5,3   | 4,0         | 5,8   | 5,0         | 8,4   |
| Shellfish                   | 1,0         | 1,5   | 1,2         | 1,8   | 1,5         | 2,0   | 1,8         | 2,6   | 2,5         | 4,3   |
| Fish_cold                   | 9,2         | 9,9   | 9,9         | 10,0  | 10,9        | 10,9  | 12,0        | 12,4  | 15,9        | 20,2  |
| Fish_smoked                 | 1,2         | 2,5   | 1,4         | 2,6   | 1,6         | 3,1   | 1,7         | 3,2   | 2,6         | 6,4   |
| Wine                        | 15,2        | 65,0  | 13,2        | 31,1  | 12,3        | 23,7  | 11,8        | 19,4  | 10,8        | 17,0  |
| Beer                        | 28,2        | 261,8 | 14,6        | 107,6 | 11,9        | 77,4  | 10,7        | 62,4  | 9,5         | 48,0  |
| Liquor                      | 0,7         | 10,0  | 0,2         | 4,1   | 0,1         | 2,5   | 0,1         | 1,7   | 0,1         | 0,6   |
| Tea                         | 153,3       | 224,7 | 156,3       | 211,7 | 150,9       | 203,5 | 148,4       | 197,0 | 144,9       | 201,6 |
| Coffee                      | 248,9       | 300,2 | 154,8       | 219,3 | 126,0       | 197,3 | 103,0       | 175,2 | 87,6        | 165,1 |
| Softdrink_sugar             | 202,0       | 313,5 | 194,7       | 271,4 | 189,8       | 255,3 | 193,2       | 256,6 | 219,9       | 312,3 |
| Softdrink_diet              | 31,0        | 95,5  | 38,8        | 98,7  | 47,6        | 115,1 | 61,4        | 147,0 | 95,3        | 226,2 |
| Water                       | 851,8       | 492,8 | 961,5       | 481,1 | 1064,6      | 485,9 | 1153,8      | 493,6 | 1282,0      | 518,0 |
| Juice                       | 135,8       | 209,9 | 150,8       | 200,6 | 173,4       | 227,1 | 191,7       | 235,4 | 228,7       | 310,1 |
| Milk_lowfat                 | 346,7       | 332,9 | 456,9       | 341,8 | 507,3       | 356,3 | 556,2       | 380,4 | 632,2       | 443,3 |
| Milk_chocolate              | 33,0        | 82,4  | 36,6        | 82,0  | 39,4        | 83,7  | 43,9        | 94,1  | 57,6        | 129,7 |
| Milk_fermented              | 5,3         | 10,6  | 4,1         | 8,3   | 3,5         | 7,0   | 3,2         | 6,6   | 2,9         | 6,1   |
| Milk_fullfat                | 124,9       | 250,7 | 36,3        | 94,3  | 27,2        | 70,6  | 22,9        | 57,4  | 21,7        | 52,0  |
| Yoghurt                     | 48,4        | 55,4  | 48,4        | 52,9  | 48,2        | 52,7  | 50,0        | 55,4  | 50,6        | 58,5  |
| Butter                      | 11,1        | 14,8  | 7,4         | 8,6   | 6,6         | 7,5   | 6,0         | 6,7   | 5,9         | 7,5   |
| Cheese                      | 3,5         | 9,4   | 2,8         | 6,5   | 2,5         | 5,8   | 2,3         | 5,4   | 2,0         | 5,3   |
| Fresh cheese                | 3,2         | 6,6   | 3,3         | 6,9   | 3,3         | 6,4   | 3,6         | 6,9   | 4,1         | 8,0   |
| Hard cheese                 | 27,0        | 21,4  | 25,3        | 19,9  | 24,9        | 19,6  | 24,3        | 19,3  | 24,9        | 19,9  |
| Snack                       | 3,7         | 4,2   | 3,9         | 4,0   | 4,0         | 4,2   | 4,2         | 4,4   | 4,7         | 6,1   |
| Egg                         | 16,1        | 11,9  | 15,1        | 10,4  | 15,0        | 10,2  | 15,1        | 10,4  | 16,2        | 15,4  |
